# Supplementary material for: Grain-Size Analysis of Middle Cretaceous Sandstone Reservoirs, the Wasia Formation, Riyadh Province, Saudi Arabia
Source: MDPI journal article supplement (doi:10.3390/su15107983), 2023-05-13
Supplement: s1 [file s1]

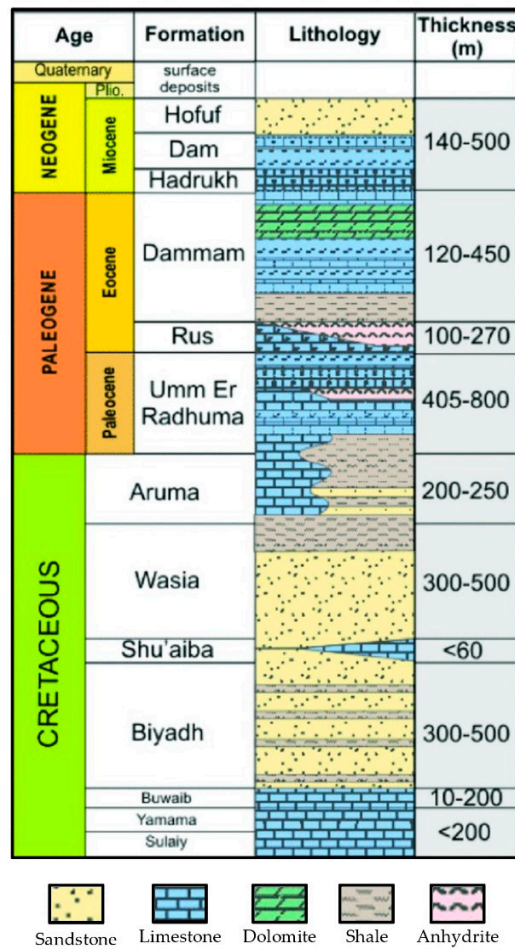

**Figure S1:** A Cretaceous and Tertiary stratigraphic column of the Arabian platform (Modified After [35, 36])
